# Supplementary material
Source: publisher figshare collection journal article supplement (https://plos.figshare.com/ndownloader/files/40892969)

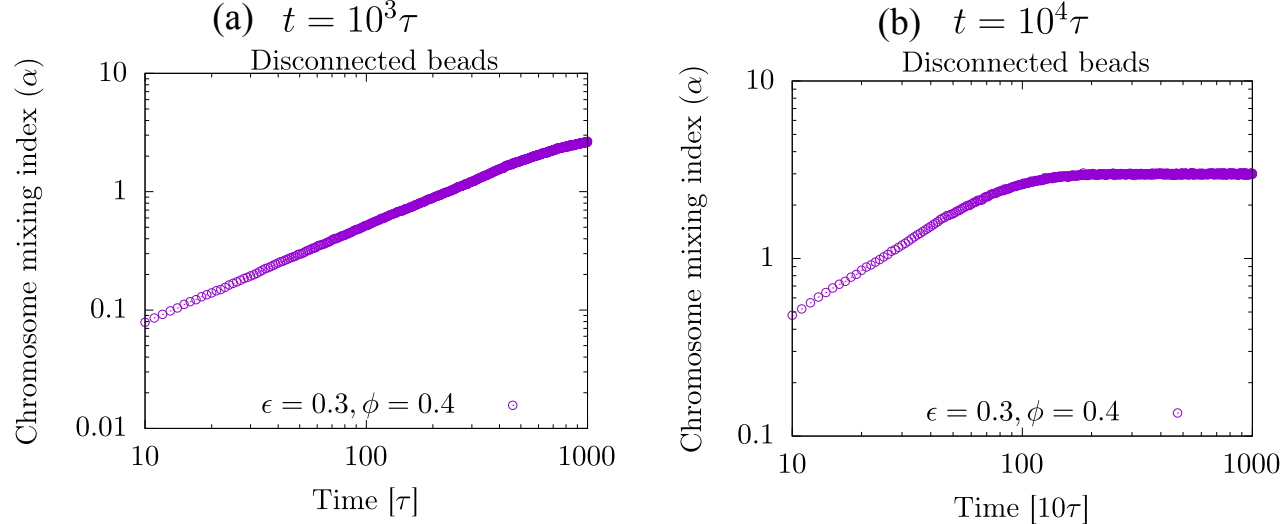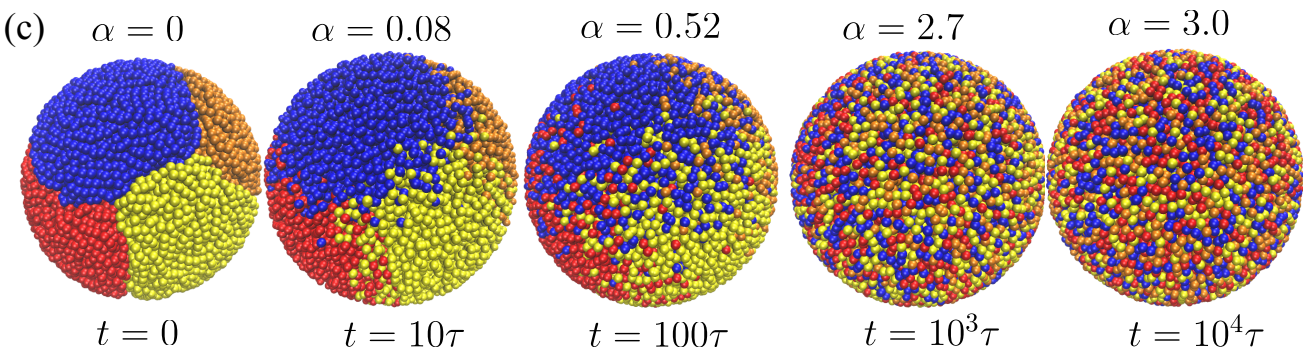

Supplement: Supplementary file [file 40892969]
